# Supplementary material
Source: PubMed Central journal article supplement (PMC1636510)

**A**

Before photoirradiation

ODN3 5'-d(GTAATTAC)-3'

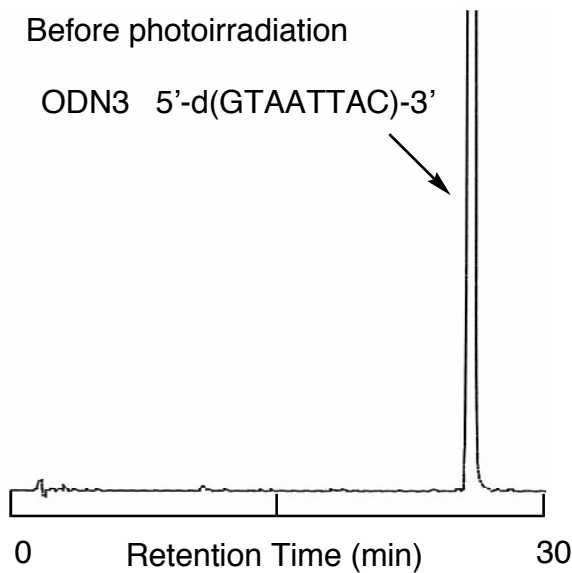**B**

Direct photoirradiation

302 nm (transilluminator )  
10 min

ODN4 5'-d(GTAAT◊TAC)-3'

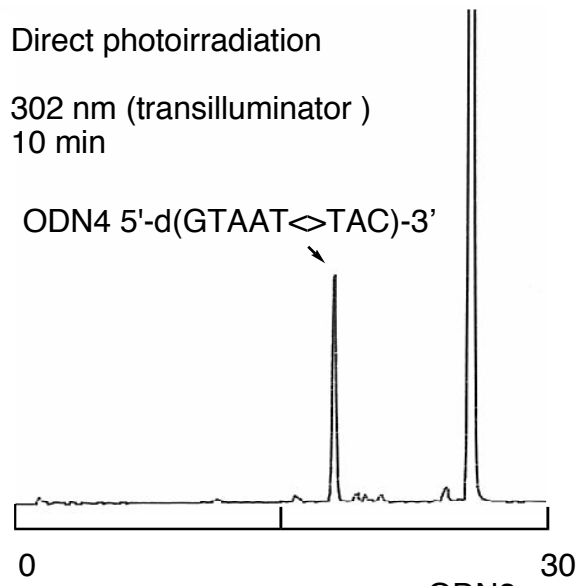**C**

Direct photoirradiation

330nm (monochromator )  
60 min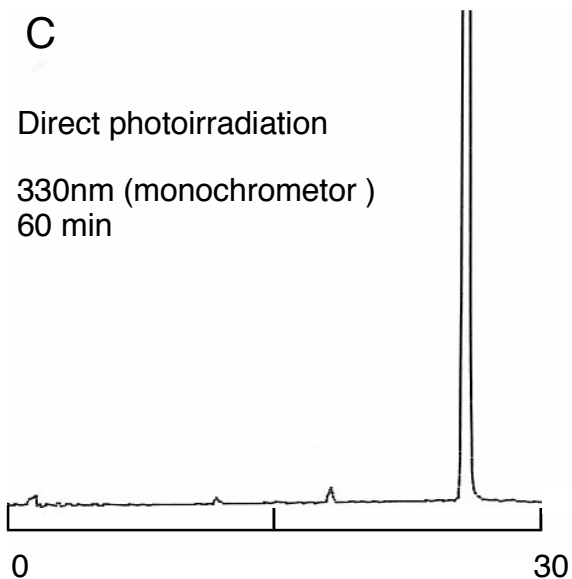**D**Photosensitization with  
5 mM acetophenone330nm (monochromator )  
60 min

ODN4

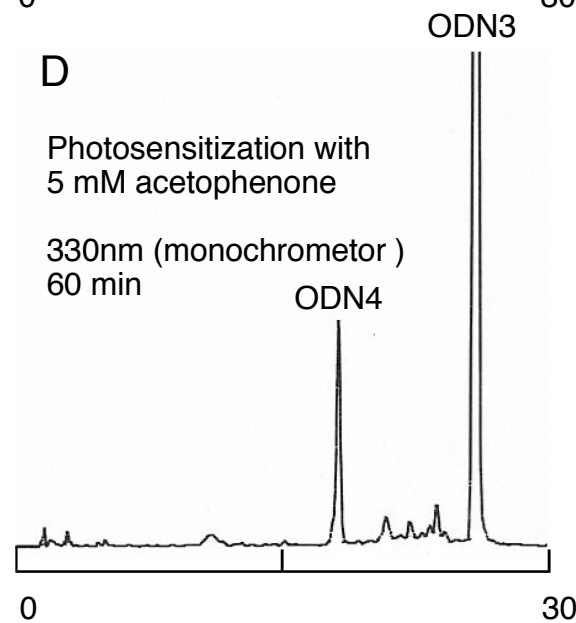

Supplement: pnas_0603484103_2.pdf [file pnas_0603484103_2.pdf]
