# Supplementary material
Source: PubMed Central journal article supplement (PMC1636510)

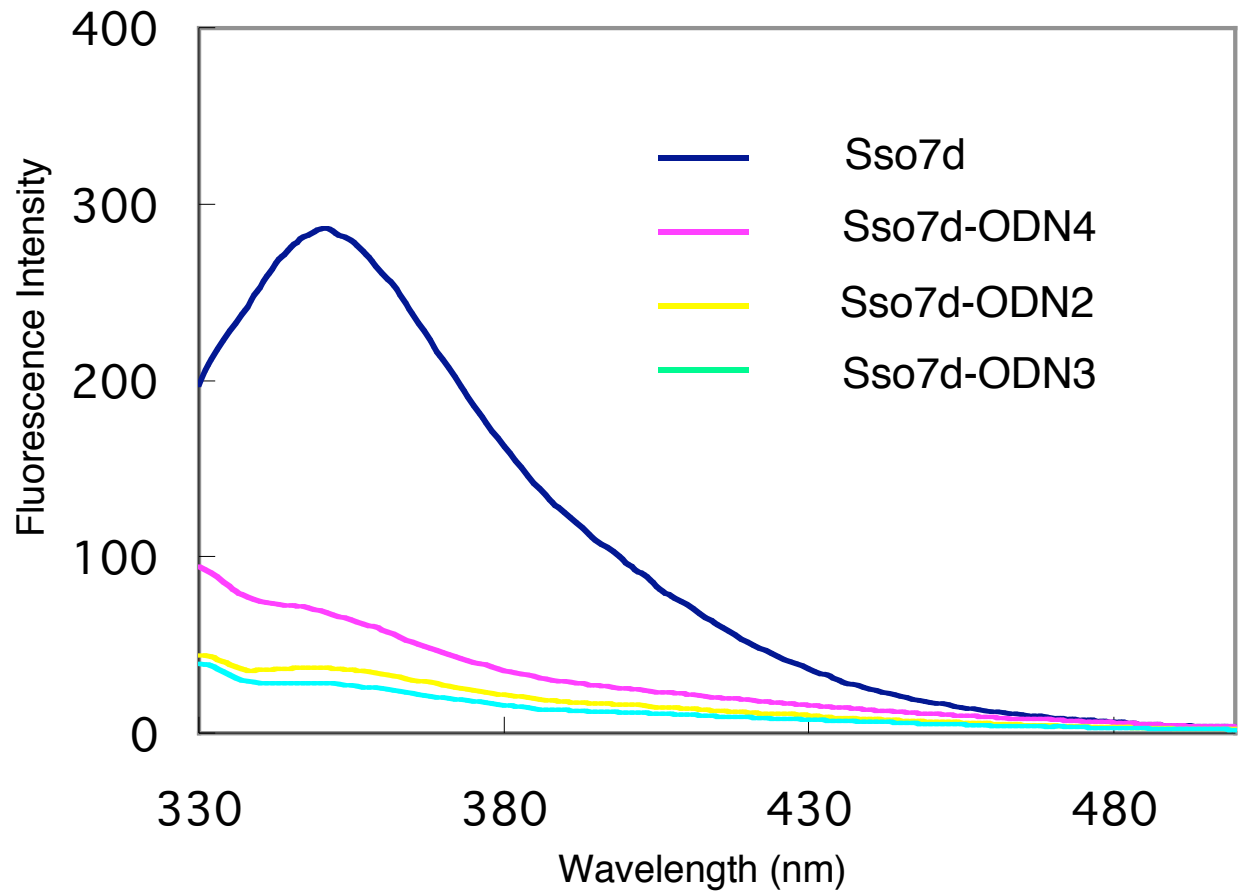

Supplement: pnas_0603484103_1.pdf [file pnas_0603484103_1.pdf]
